# Supplementary material for: Association of oropharyngeal cancer recurrence with tumor-intrinsic and immune-mediated sequelae of reduced genomic instability
Source: PubMed Central journal article supplement — bioRxiv. 2024 Nov 4:2024.10.31.621311. Preprint. [Version 1] doi: 10.1101/2024.10.31.621311 (PMC11580908; doi:10.1101/2024.10.31.621311), 2024-11-04
Supplement: media-1.pdf [file media-1.pdf]

**Supplementary Table 1: Antibodies and staining conditions**

| <b>Protein</b> | <b>Clone</b>  | <b>Supplier</b> | <b>Catalog#</b> | <b>Species</b> | <b>Dilution</b> | <b>HIER*</b> | <b>Protocol ID†</b> |
|----------------|---------------|-----------------|-----------------|----------------|-----------------|--------------|---------------------|
| CD3            | LN10          | Leica           | PA0553          | Mouse          | pre-diluted     | ER2/20 min   | HUP Refine          |
| CD8            | c8/144b       | Dako            | M7103           | Mouse          | 1:40            | ER1/20 min   | HUP Refine          |
| CD45 (LCA)     | 2B11 + PD7/26 | Dako            | M0701           | Mouse          | 1:200           | ER1/10 min   | HUP Refine          |
| gH2AX          | 20E3          | Cell Signaling  | 9718S           | Rabbit         | 1:50            | ER2/20 min   | HUP 60/20           |
| PDL1           | E1J2J         | Cell Signaling  | 15165BF         | Rabbit         | 1:500           | ER2/20 min   | HUP 60/20           |
| S4/8 pRPA32    | (polyclonal)  | Abcam           | ab87277         | Rabbit         | 1:100           | ER2/20 min   | HUP Refine          |

\***HIER**: Heat-induced epitope retrieval method (detailed in Supplementary Methods)

†**Protocol ID**: The two different IHC staining protocols are detailed in Supplementary Methods.

**Supplementary Table 2: Characteristics of total cohort (n=851)**

| <b>Variable</b>                                            | <b>Categories</b>           | <b>Number</b> | <b>Percent</b> |
|------------------------------------------------------------|-----------------------------|---------------|----------------|
| Overall pathologic stage<br>(8 <sup>th</sup> edition AJCC) | Stage I                     | 645           | 75.8%          |
|                                                            | Stage II                    | 190           | 22.3%          |
|                                                            | Stage III                   | 16            | 1.9%           |
| Pathologic T-stage                                         | pT0                         | 3             | 0.4%           |
|                                                            | pT1                         | 350           | 41.1%          |
|                                                            | pT2                         | 412           | 48.4%          |
|                                                            | pT3                         | 69            | 8.1%           |
|                                                            | pT4                         | 17            | 2.0%           |
| Pathologic N-stage                                         | pN0                         | 125           | 14.7%          |
|                                                            | pN1                         | 590           | 69.3%          |
|                                                            | pN2                         | 133           | 15.6%          |
|                                                            | pNx                         | 3             | 0.4%           |
| Treatment                                                  | Surgery only                | 187           | 22.0%          |
|                                                            | Surgery + radiotherapy      | 311           | 36.6%          |
|                                                            | Surgery + chemoradiotherapy | 250           | 29.4%          |
|                                                            | Unknown                     | 103           | 12.1%          |
| Smoking history                                            | ≤10 pack-years              | 554           | 65.1%          |
|                                                            | >10 pack-years              | 255           | 30.0%          |
|                                                            | Unknown                     | 42            | 4.9%           |
| Overall clinical stage<br>(8 <sup>th</sup> edition AJCC)   | Stage I                     | 697           | 81.9%          |
|                                                            | Stage II                    | 55            | 6.5%           |
|                                                            | Stage III                   | 58            | 6.8%           |
|                                                            | Unknown                     | 41            | 4.8%           |
| Clinical T-stage                                           | cT1                         | 213           | 25.0%          |
|                                                            | cT2                         | 382           | 44.9%          |
|                                                            | cT3                         | 32            | 3.8%           |
|                                                            | cT4                         | 47            | 5.5%           |
|                                                            | cTx                         | 109           | 12.8%          |
|                                                            | cT0                         | 9             | 1.1%           |
|                                                            | Unknown                     | 59            | 6.9%           |
| Clinical N-stage                                           | cN0                         | 121           | 14.2%          |
|                                                            | cN1                         | 634           | 74.5%          |
|                                                            | cN2                         | 30            | 3.5%           |
|                                                            | cN3                         | 5             | 0.6%           |
|                                                            | Unknown                     | 61            | 7.2%           |
| Primary tumor site                                         | Tonsil                      | 459           | 53.9%          |
|                                                            | Tongue base                 | 317           | 37.3%          |
|                                                            | Overlap                     | 62            | 7.3%           |
|                                                            | Synchronous                 | 5             | 0.6%           |

**(continued)**

|                                 |                         |       |       |
|---------------------------------|-------------------------|-------|-------|
|                                 | Unknown primary         | 8     | 0.9%  |
| Pathologic level IV/V nodes     | No                      | 744   | 87.4% |
|                                 | Yes                     | 77    | 9.1%  |
|                                 | Unknown                 | 30    | 3.5%  |
| Margin status                   | Negative                | 610   | 71.7% |
|                                 | In-situ or Close (<2mm) | 160   | 18.8% |
|                                 | Positive                | 57    | 6.7%  |
|                                 | Unknown                 | 24    | 2.8%  |
| Lymphovascular space Invasion   | No                      | 559   | 65.7% |
|                                 | Yes                     | 256   | 30.1% |
|                                 | Unknown                 | 36    | 4.2%  |
| Perineural invasion             | No                      | 689   | 81.0% |
|                                 | Yes                     | 125   | 14.7% |
|                                 | Unknown                 | 37    | 4.4%  |
| Pathologic extranodal extension | No                      | 599   | 70.4% |
|                                 | Yes                     | 228   | 26.8% |
|                                 | Unknown                 | 24    | 2.8%  |
| # positive nodes                | Mean                    | 2.62  |       |
|                                 | Range                   | 0-48  |       |
| Age                             | Median                  | 60    |       |
|                                 | Range                   | 32-89 |       |
| Sex                             | Male                    | 741   | 87.1% |
|                                 | Female                  | 110   | 12.9% |
| Race                            | White                   | 785   | 92.2% |
|                                 | Non-white               | 62    | 7.3%  |
|                                 | Unknown                 | 4     | 0.5%  |
| Charlson comorbidity index      | 0                       | 562   | 66.0% |
|                                 | ≥1                      | 149   | 17.5% |
|                                 | Unknown                 | 140   | 16.5% |

**Supplementary Table 3: Characteristics of matched cases and controls highlighting imperfectly matched traits (red text)**

| Pair number | Recurrence |     |     |          |               |                        | Control  |     |     |          |               |                        |
|-------------|------------|-----|-----|----------|---------------|------------------------|----------|-----|-----|----------|---------------|------------------------|
|             | Smoking    | pT  | pN  | pOverall | Treatment     | Systemic agent         | Smoking  | pT  | pN  | pOverall | Treatment     | Systemic agent         |
| 1           | ≤10pk-yr   | pT1 | pN2 | 2        | Surgery + CRT | Cisplatin              | ≤10pk-yr | pT1 | pN2 | 2        | Surgery + CRT | Cisplatin              |
| 2           | ≤10pk-yr   | pT3 | pN1 | 2        | Surgery + CRT | Cisplatin              | ≤10pk-yr | pT3 | pN1 | 2        | Surgery + CRT | Cisplatin              |
| 3           | >10pk-yr   | pT2 | pN2 | 2        | Surgery + CRT | Cisplatin              | >10pk-yr | pT2 | pN2 | 2        | Surgery + CRT | Cisplatin              |
| 4           | ≤10pk-yr   | pT2 | pN1 | 1        | Surgery + CRT | Cisplatin              | ≤10pk-yr | pT2 | pN1 | 1        | Surgery + CRT | Cisplatin              |
| 5           | ≤10pk-yr   | pT2 | pN1 | 1        | Surgery + RT  |                        | ≤10pk-yr | pT2 | pN1 | 1        | Surgery + RT  |                        |
| 6           | ≤10pk-yr   | pT1 | pN1 | 1        | Surgery + RT  |                        | ≤10pk-yr | pT1 | pN1 | 1        | Surgery + RT  |                        |
| 7           | ≤10pk-yr   | pT1 | pN1 | 1        | Surgery + RT  |                        | ≤10pk-yr | pT1 | pN1 | 1        | Surgery + RT  |                        |
| 8           | ≤10pk-yr   | pT2 | pN1 | 1        | Surgery + CRT | Cisplatin              | ≤10pk-yr | pT2 | pN1 | 1        | Surgery + CRT | Cisplatin              |
| 9           | ≤10pk-yr   | pT2 | pN2 | 2        | Surgery + CRT | Carboplatin/paclitaxel | ≤10pk-yr | pT2 | pN2 | 2        | Surgery + CRT | Carboplatin/paclitaxel |
| 10          | ≤10pk-yr   | pT2 | pN2 | 2        | Surgery + CRT | Cisplatin              | ≤10pk-yr | pT2 | pN2 | 2        | Surgery + CRT | Cisplatin              |
| 11          | >10pk-yr   | pT2 | pN2 | 2        | Surgery + CRT | Cetuximab              | >10pk-yr | pT2 | pN2 | 2        | Surgery + CRT | Cetuximab              |
| 12*         | ≤10pk-yr   | pT3 | pN0 | 2        | Surgery + RT  |                        | ≤10pk-yr | pT3 | pN0 | 2        | Surgery + RT  |                        |
| 14          | >10pk-yr   | pT2 | pN1 | 1        | Surgery Only  |                        | >10pk-yr | pT2 | pN1 | 1        | Surgery Only  |                        |
| 15          | >10pk-yr   | pT3 | pN1 | 2        | Surgery + CRT | Cisplatin              | >10pk-yr | pT3 | pN1 | 2        | Surgery + CRT | Cisplatin              |
| 16          | >10pk-yr   | pT0 | pN2 | 2        | Surgery + CRT | Cetuximab              | >10pk-yr | pT2 | pN2 | 2        | Surgery + CRT | Cisplatin              |
| 18          | ≤10pk-yr   | pT1 | pN2 | 2        | Surgery + CRT | Cetuximab              | ≤10pk-yr | pT1 | pN2 | 2        | Surgery + CRT | Cisplatin              |
| 19          | ≤10pk-yr   | pT2 | pN2 | 2        | Surgery + CRT | Cisplatin              | ≤10pk-yr | pT2 | pN2 | 2        | Surgery + CRT | Cisplatin              |
| 20          | ≤10pk-yr   | pT2 | pN2 | 2        | Surgery + CRT | Cisplatin              | ≤10pk-yr | pT2 | pN2 | 2        | Surgery + CRT | Cisplatin              |
| 21          | ≤10pk-yr   | pT2 | pN2 | 2        | Surgery + CRT | Cisplatin              | ≤10pk-yr | pT2 | pN2 | 2        | Surgery + CRT | Cisplatin              |
| 22          | ≤10pk-yr   | pT3 | pN1 | 2        | Surgery + CRT | Cisplatin              | ≤10pk-yr | pT3 | pN1 | 2        | Surgery + CRT | Cisplatin              |
| 23          | ≤10pk-yr   | pT1 | pN2 | 2        | Surgery + CRT | Cisplatin              | ≤10pk-yr | pT1 | pN2 | 2        | Surgery + CRT | Cisplatin              |
| 24          | >10pk-yr   | pT2 | pN2 | 2        | Surgery + CRT | Cisplatin              | >10pk-yr | pT1 | pN2 | 2        | Surgery + CRT | Cisplatin              |
| 25          | >10pk-yr   | pT1 | pN2 | 2        | Surgery + CRT | Cetuximab              | >10pk-yr | pT1 | pN2 | 2        | Surgery + CRT | Cetuximab              |
| 26*         | ≤10pk-yr   | pT3 | pN0 | 2        | Surgery + RT  |                        | ≤10pk-yr | pT3 | pN0 | 2        | Surgery + RT  |                        |
| 27          | ≤10pk-yr   | pT1 | pN2 | 2        | Surgery + RT  |                        | ≤10pk-yr | pT1 | pN2 | 2        | Surgery + RT  |                        |
| 28          | ≤10pk-yr   | pT2 | pN2 | 2        | Surgery Only  |                        | ≤10pk-yr | pT3 | pN1 | 2        | Surgery Only  |                        |
| 29†         | >10pk-yr   | pT2 | pN2 | 2        | Surgery + RT  |                        | >10pk-yr | pT1 | pN2 | 2        | Surgery + RT  |                        |
| 30          | ≤10pk-yr   | pT2 | pN1 | 1        | Surgery + CRT | Cisplatin              | ≤10pk-yr | pT2 | pN1 | 1        | Surgery + CRT | Cisplatin              |
| 31          | ≤10pk-yr   | pT1 | pN1 | 1        | Surgery + CRT | Cisplatin              | ≤10pk-yr | pT1 | pN1 | 1        | Surgery + CRT | Cisplatin              |
| 32          | ≤10pk-yr   | pT2 | pN1 | 1        | Surgery + CRT | Cetuximab              | ≤10pk-yr | pT2 | pN1 | 1        | Surgery + CRT | Cetuximab              |
| 33          | ≤10pk-yr   | pT2 | pN1 | 1        | Surgery + CRT | Cisplatin              | ≤10pk-yr | pT2 | pN1 | 1        | Surgery + CRT | Cisplatin              |
| 34          | >10pk-yr   | pT2 | pN1 | 1        | Surgery + CRT | Cisplatin              | >10pk-yr | pT2 | pN1 | 1        | Surgery + CRT | Cisplatin              |

(continued)

|     |          |     |     |   |               |           |          |     |     |   |               |           |
|-----|----------|-----|-----|---|---------------|-----------|----------|-----|-----|---|---------------|-----------|
| 35  | >10pk-yr | pT2 | pN1 | 1 | Surgery + CRT | Cisplatin | >10pk-yr | pT2 | pN1 | 1 | Surgery + CRT | Cisplatin |
| 36  | ≤10pk-yr | pT2 | pN1 | 1 | Surgery + RT  |           | ≤10pk-yr | pT2 | pN1 | 1 | Surgery + RT  |           |
| 37  | ≤10pk-yr | pT2 | pN1 | 1 | Surgery + RT  |           | ≤10pk-yr | pT1 | pN1 | 1 | Surgery + RT  |           |
| 38  | ≤10pk-yr | pT2 | pN1 | 1 | Surgery + RT  |           | ≤10pk-yr | pT2 | pN1 | 1 | Surgery + RT  |           |
| 39  | ≤10pk-yr | pT2 | pN1 | 1 | Surgery + RT  |           | ≤10pk-yr | pT2 | pN1 | 1 | Surgery + RT  |           |
| 40  | ≤10pk-yr | pT2 | pN1 | 1 | Surgery + RT  |           | ≤10pk-yr | pT1 | pN1 | 1 | Surgery + RT  |           |
| 41* | ≤10pk-yr | pT2 | pN0 | 1 | Surgery + RT  |           | ≤10pk-yr | pT2 | pN0 | 1 | Surgery + RT  |           |
| 42  | ≤10pk-yr | pT1 | pN1 | 1 | Surgery + RT  |           | ≤10pk-yr | pT1 | pN1 | 1 | Surgery + RT  |           |
| 43  | ≤10pk-yr | pT2 | pN1 | 1 | Surgery + RT  |           | ≤10pk-yr | pT2 | pN1 | 1 | Surgery + RT  |           |
| 44  | ≤10pk-yr | pT2 | pN1 | 1 | Surgery + RT  |           | ≤10pk-yr | pT2 | pN1 | 1 | Surgery + RT  |           |
| 45  | >10pk-yr | pT2 | pN1 | 1 | Surgery + RT  |           | >10pk-yr | pT2 | pN1 | 1 | Surgery + RT  |           |
| 46  | >10pk-yr | pT2 | pN0 | 1 | Surgery Only  |           | >10pk-yr | pT2 | pN0 | 1 | Surgery Only  |           |
| 48  | >10pk-yr | pT1 | pN1 | 1 | Surgery Only  |           | >10pk-yr | pT1 | pN1 | 1 | Surgery Only  |           |
| 49† | >10pk-yr | pT1 | pN2 | 2 | Surgery + RT  |           | >10pk-yr | pT1 | pN2 | 2 | Surgery + RT  |           |
| 50  | >10pk-yr | pT2 | pN2 | 2 | Surgery + CRT | Cisplatin | >10pk-yr | pT2 | pN2 | 2 | Surgery + CRT | Cisplatin |
| 51  | >10pk-yr | pT3 | pN1 | 2 | Surgery + CRT | Cisplatin | >10pk-yr | pT3 | pN1 | 2 | Surgery + CRT | Cisplatin |
| 52* | ≤10pk-yr | pT2 | pN0 | 1 | Surgery + RT  |           | >10pk-yr | pT2 | pN0 | 1 | Surgery + RT  |           |
| 54  | ≤10pk-yr | pT2 | pN2 | 2 | Surgery + CRT | Cisplatin | ≤10pk-yr | pT2 | pN2 | 2 | Surgery + CRT | Cisplatin |

\*Cases and controls were sequenced from primary tumor and not metastatic lymph nodes.

†Same control was used for two cases

pk-yr = pack years, RT = radiation therapy, CRT = chemoradiation

**Supplementary Table 4: Characteristics of HPV+ OPSCC patients in three validation cohorts**

| Cohort | Total patients | Patients receiving nonsurgical therapy | Patients with recurrence | Months to last recurrence event | Potential controls |
|--------|----------------|----------------------------------------|--------------------------|---------------------------------|--------------------|
| UNC    | 89             | 81                                     | 15                       | 58.6                            | 53                 |
| JHU    | 47             | 16                                     | 4                        | 48.7                            | 19                 |
| TCGA   | 53             | 29                                     | 6                        | 41.6                            | 12                 |

## **Supplementary Methods**

### **Matching strategy in absence of a perfect control match**

Six recurrent cases for which optimal pT and/or pN control matches were not identified without disrupting matching by the other criteria (R16, R24, R28, R29, R37, R40) were paired with controls with different pT and/or pN but the same pathologic overall stage. One of these six cases (R16), which received adjuvant cetuximab, was matched with a control that received cisplatin. These differences are highlighted in Supplementary Table 3.

### **Sample description, mRNA Library preparation and sequencing**

Two tumor tissue sample were macrodissected from FFPE blocks of each patient. RNA sample quality was assessed by RNA TapeStation (Agilent Technologies) and quantified by AccuBlue® Broad Range RNA Quantitation assay (Biotium). Total RNA libraries were created using Illumina Stranded with RiboZero plus kit. Final library quantity was estimated by Qubit 2.0 (ThermoFisher) and quality was assessed by TapeStation HSD1000 ScreenTape (Agilent Technologies). Final library size was ~350bp with an insert size of about 200bp based on Illumina® 8-nt unique dual-indices. Libraries were pooled in equimolar proportions and sequenced on an Illumina® Novaseq platform with a read length configuration of 150 for 80M paired end reads per sample (40M in each direction).

### **Processing of RNASeq data**

Low-quality bases and adapter sequences from raw RNA sequencing FASTQ files were trimmed using Trimmomatic-0.32 [1]. Filtered high quality sequencing reads were then aligned to the GRCh38 genome [2] with STAR v2.7.1a [3] with `-twopassMode`, `--outFilterIntronMotifs` and `RemoveNoncanonical` parameters. Quantification of reads aligned to exonic regions was conducted using STAR's `-quant` mode and HTSeq2.0 [4]. DeSeq2 collapse replicate was used for combining replicates and normalization [5].

### **Viral transcript alignment**

Revised HPV16 reference genome and genomic annotations were obtained from the papillomavirus episteme (PaVE) [6]. Star genome index was generated using `genomeSAindexNbases 8` as per size of HPV16 genome (7904 bases). Unaligned reads after human reference genome alignment were used to perform alignment with revised HPV16 viral genome with using STAR v2.7.1a `-twopassMode`. Quantification of reads aligned to exonic regions was conducted using STAR's `-quant` mode and HTSeq2.0[4].

### **GSEA, GSVA, and calculation of combined score from TPS and ISS**

Gene set enrichment analysis (GSEA) [7] was performed on the Hallmark gene set (H subset, n=50 pathways) [8] and non-disease-associated KEGG Legacy pathways (subset of CP pathways, n=147) [9] using the `fgsea` R package [10] with 1000 permutations. Gene set variation analysis (GSVA) scores were generated for unique genes within pathways associated with immune suppression (n=921) and tumor progression (n=1569) using the `ssGSEA` R package [11] with options set to `kcdf = "gaussian"`, `maximum group size = "2000"`, and `mx.diff parameter = "true"`. GSVA scores were generated for external cohorts using gene lists obtained from case control cohort for tumor progression and immune suppression with same parameters.

Multivariate logistic regression analysis was used to construct a combined score from GSVA-derived ISS and TPS scores. Considering significant correlation between these scores,

interaction term was also incorporated in the calculation of combined scores by the following equation:  $Combined\ Score = (TPS \times 2.826) + (ISS \times 3.521) + (ISS \times TPS \times -1.894) - 2.66$ .

### **Details of R v4.2 usage**

Youden-index was calculated using the cutpointR package [12]. R package pROC was used for ROC analysis [13]. For survival analysis, the Survminer [14] R package was used.

### **Immunohistochemistry details**

Heat-induced epitope retrieval was performed per manufacture protocol using combinations of the following two buffers: Epitope Retrieval 1 (ER1) (Leica, Cat#AR9961) and Epitope Retrieval 2 (ER2) (Leica, Cat#AR9640). IHC staining was performed by one of two protocols, HUP 60/20 and HUP Refine, which differ in primary antibody incubation times. The HUP Refine protocol uses an incubation time of 15 minutes with the primary antibody and 8 minutes with the secondary antibody. The HUP 60/20 protocol uses an incubation time of 60 minutes for primary antibody and 20 minutes for secondary antibody. The anti-mouse or anti-rabbit secondary antibodies used in both protocols are part of the Refine Detection Kit (Cat#DS9800).



## Supplementary References

1. Bolger AM, Lohse M, Usadel B. Trimmomatic: a flexible trimmer for Illumina sequence data. *Bioinformatics*. 2014 Aug 1;30(15):2114-20.
2. Miga KH, Newton Y, Jain M, Altemose N, Willard HF, Kent WJ. Centromere reference models for human chromosomes X and Y satellite arrays. *Genome Res*. 2014 Apr;24(4):697-707.
3. Dobin A, Davis CA, Schlesinger F, Drenkow J, Zaleski C, Jha S, Batut P, Chaisson M, Gingeras TR. STAR: ultrafast universal RNA-seq aligner. *Bioinformatics*. 2013 Jan 1;29(1):15-21.
4. Putri GH, Anders S, Pyl PT, Pimanda JE, Zanini F. Analysing high-throughput sequencing data in Python with HTSeq 2.0. *Bioinformatics*. 2022 May 13;38(10):2943-2945.
5. Love MI, Huber W, Anders S. Moderated estimation of fold change and dispersion for RNA-seq data with DESeq2. *Genome Biol*. 2014;15(12):550.
6. Van Doorslaer K, Li Z, Xirasagar S, Maes P, Kaminsky D, Liou D, Sun Q, Kaur R, Huyen Y, McBride AA. The Papillomavirus Episteme: a major update to the papillomavirus sequence database. *Nucleic Acids Res*. 2017 Jan 4;45(D1):D499-D506.
7. Subramanian A, Tamayo P, Mootha VK, Mukherjee S, Ebert BL, Gillette MA, Paulovich A, Pomeroy SL, Golub TR, Lander ES, Mesirov JP. Gene set enrichment analysis: a knowledge-based approach for interpreting genome-wide expression profiles. *Proc Natl Acad Sci U S A*. 2005 Oct 25;102(43):15545-50.
8. Liberzon A, Birger C, Thorvaldsdóttir H, Ghandi M, Mesirov JP, Tamayo P. The Molecular Signatures Database (MSigDB) hallmark gene set collection. *Cell Syst*. 2015 Dec 23;1(6):417-425.
9. Kanehisa M, Sato Y, Kawashima M, Furumichi M, Tanabe M. KEGG as a reference resource for gene and protein annotation. *Nucleic Acids Res*. 2016 Jan 4;44(D1):D457-62.
10. Korotkevich, G., Sukhov, V., Budin, N., Shpak, B., Artyomov, M.N. and Sergushichev, A., 2016. Fast gene set enrichment analysis. *bioRxiv*, p.060012.
11. Reich M, Liefeld T, Gould J, Lerner J, Tamayo P, Mesirov JP. GenePattern 2.0. *Nat Genet*. 2006;38(5):500-1.
12. Thiele, C., & Hirschfeld, G. (2021). cutpointr: Improved Estimation and Validation of Optimal Cutpoints in R. *Journal of Statistical Software*, 98(11), 1–27.

13. Robin X, Turck N, Hainard A, Tiberti N, Lisacek F, Sanchez JC, Müller M. pROC: an open-source package for R and S+ to analyze and compare ROC curves. BMC Bioinformatics. 2011 Mar 17;12:77.
14. Kassambara A, Kosinski M, Biecek P. survminer: Drawing Survival Curves using 'ggplot2'. R package version 0.4.9.999, 2021 <https://github.com/kassambara/survminer>
